# Supplementary material for: Novel Structural Components of the Ventral Disc and Lateral Crest in Giardia intestinalis
Source: PubMed Central journal article supplement (PMC3243723; doi:10.1371/journal.pntd.0001442), 2011-12-20
Supplement: pntd.0001442.s001.pdf [file pntd.0001442.s001.pdf]

|                           | 10    | 20  | 30       | 40       | 50                              | 60                              |                                  |                            |                    |                           |
|---------------------------|-------|-----|----------|----------|---------------------------------|---------------------------------|----------------------------------|----------------------------|--------------------|---------------------------|
| <i>CAMKKMmu</i> ,/1-251   |       |     | YDFRDV   | LGTGAF   | SEVILA                          | EDKR--TQKL--V-AIKCIAK           |                                  |                            |                    |                           |
| <i>NrkCfa</i> ,/1-258     |       |     | YVLTITLV | GRNPTTAA | FVATRGSDP                       | SEKV--VAKFVMLNDD                |                                  |                            |                    |                           |
| <i>Nrk6Cre</i> ,/1-257    |       |     | YDVQKPV  | GKGGYAVV | YKGI RRD--DGRV--V-AVKKVEIFEM    |                                 |                                  |                            |                    |                           |
| <i>Nek7simCel</i> ,/1-266 |       |     | FIIIEKKI | GKGGQFSE | VFR AQCTW--VDLH--V-ALKKIQVFEMV  |                                 |                                  |                            |                    |                           |
| <i>NEK6Hs</i> ,/1-266     |       |     | FQIEKKI  | GRGQFSE  | VYKATCLL--DRKT--V-ALKKVQIFEMM   |                                 |                                  |                            |                    |                           |
| <i>NEK7Hs</i> ,/1-265     |       |     | FRIEKKI  | GRGQFSE  | VYRAACLL--DGVP--V-ALKKVQIFDLM   |                                 |                                  |                            |                    |                           |
| <i>Nek82Cel</i> ,/1-264   |       |     | YEKVRV   | VGRGAF   | GVCWLCRGN--DASHQKV--IIKLINTHGM  |                                 |                                  |                            |                    |                           |
| <i>NEK9Nercc1</i> ,/1-257 |       |     | YIPIRV   | LGRGAF   | GEATLYRRE--DDSL--V-VWKEVDLTRL   |                                 |                                  |                            |                    |                           |
| <i>NRK16Tth</i> ,/1-256   |       |     | YKVLKT   | LGGQAG   | SGSELVQKN--DGNL--Y-ALKTI SMKYM  |                                 |                                  |                            |                    |                           |
| <i>NRK24Tth</i> ,/1-256   |       |     | YKVIRM   | IGQGAG   | GSVELVQKRS--DGQL--F-ALKTI SMKFM |                                 |                                  |                            |                    |                           |
| <i>Nek81Cel</i> ,/1-254   |       |     | YERIRT   | VGKGA    | FSAVLYRRRE--DSSL--V-IIKEINMYDL  |                                 |                                  |                            |                    |                           |
| <i>Nek8simDme</i> ,/1-254 |       |     | YEKVRV   | VGGQSF   | GIAILYRRKS--DGHQ--I-VFKQINLSEL  |                                 |                                  |                            |                    |                           |
| <i>Fin1Spo</i> ,/1-278    |       |     | YKILEC   | IGHGS    | FGR IYKVQR                      | LK--DGAL--L-AQKEIHFGNI          |                                  |                            |                    |                           |
| <i>TvSTEPK</i> /1-307     |       |     | MLDK     | YEIERL   | GQGSFGSVCKA                     | IRKS--DQKV--V-AIKEISYSQM        |                                  |                            |                    |                           |
| <i>TvAGCPK</i> /1-307     |       |     | MFSKPN   | LEGEY    | EIKDFIGKGS                      | FGQAYIAIRKS--DNKT--V-ALKQINYGNM |                                  |                            |                    |                           |
| <i>KIN3Sce</i> ,/1-323    |       |     | YQVLEE   | IGRGS    | FGSVRKVIHI                      | P--TKKL--L-VRKDIKYGHM           |                                  |                            |                    |                           |
| <i>Nek2simDme</i> ,/1-263 |       |     | YEVLA    | VMGN     | GSFGTCYKVR                      | DKS--TGEL--F-AWKG MNYDEL        |                                  |                            |                    |                           |
| <i>Ng29678</i> /1-363     |       |     | METGL    | ADFDVV   | EQLGHGS                         | FGSVYKVK                        | SKK--DHR I--Y-VWKEIDYGRM         |                            |                    |                           |
| <i>NIM1Ncr</i> ,/1-284    |       |     | YELLE    | EIGHGS   | FGIIRK                          | VRRKA--DGM I--L-CRKEISYLKM      |                                  |                            |                    |                           |
| <i>NIMAAnid</i> ,/1-285   |       |     | YEVLE    | EIGHGS   | FGIIRK                          | VKRKS--DGFI--L-CRKEINYIKM       |                                  |                            |                    |                           |
| <i>NRK5Tth</i> ,/1-259    |       |     | FEILSK   | LGE      | GSFSTVYR                        | VRRGK--DGKE--Y-ALKRIKMMKL       |                                  |                            |                    |                           |
| <i>NRK4Tth</i> ,/1-257    |       |     | FDVIRK   | LGE      | GAYSSV                          | VFKVRKIS--NGQD--Y-AMKNIKMGS     |                                  |                            |                    |                           |
| <i>NRK2Tth</i> ,/1-257    |       |     | FVNLQK   | IGEG     | SYSSVHK                         | VRRIS--DNQE--Y-ALKKVKLSGL       |                                  |                            |                    |                           |
| <i>NRK31Ttha</i> ,/1-263  |       |     | FEVISK   | LGE      | GSFSQVFQV                       | KRKS--DGM I--Y-AMKKVKMGLL       |                                  |                            |                    |                           |
| <i>NRK1Tth</i> ,/1-259    |       |     | FEILK    | RLEG     | GSFGSVYQ                        | VKRKS--DEKI--Y-AMKKVKMMSL       |                                  |                            |                    |                           |
| <i>NRK3Tth</i> ,/1-258    |       |     | FNVQKT   | LGN      | GAFSWVYK                        | VQRKQ--DGQV--Y-ALKKVKLREL       |                                  |                            |                    |                           |
| <i>NRK7Tth</i> ,/1-257    |       |     | FDI      | IKTLG    | EGSFAKVYK                       | VVRKS--DGQS--Y-AMKRCKIGLM       |                                  |                            |                    |                           |
| <i>NRK9Tth</i> ,/1-273    |       |     | FKILCK   | LGE      | GSFSTVFKV                       | LRLV--DNKI--Y-AMKKVQMSRL        |                                  |                            |                    |                           |
| <i>13981lc</i> /1-1109    |       |     | MSAHHI   | SSRYH    | ILEPY                           | SVEPHIQV                        | S LAKNKE--TGEL--V-DYHNICYEKL     |                            |                    |                           |
| <i>17231lc</i> /1-1006    |       |     | MLR      | IAFANRY  | TVRHAIEE                        | GSESTWYS                        | VERKN--DGLP--F-SCREYSVRHL        |                            |                    |                           |
| <i>24321disc</i> /1-288   |       |     | MQTF     | SFADKY   | TEVGV                           | IEEA                            | EYQRLVEVQDKE--TGER--Y-LCRQISLEEY |                            |                    |                           |
| <i>17250</i> /1-854       |       |     | MTLYL    | PPAY     | EAVRY                           | LNSDI                           | YGISY                            | LVRDRN--LDLSA--T-CRIVSEADV |                    |                           |
| <i>15409</i> /1-515       |       |     | MDG      | QAFAMDY  | QPVAD                           | IYSTGV                          | HEIASARSTRDP                     | SSNI--ALFTCSYGGF           |                    |                           |
| <i>11775</i> /1-1618      |       |     | MADNE    | YTLISQV  | SATENCK                         | TMLVQ                           | HNG--TGN Y--AFKYFYT SWP          |                            |                    |                           |
| <i>8445</i> /1-597        |       |     | MG       | IAEKLA   | EYRELMA                         | IKRGHY                          | GIVHK                            | VEHIS--TKKI--Y-ARKTVKYGKL  |                    |                           |
| <i>11311_mp</i> /1-367    | MYNAN | PKP | SQQGG    | ARESR    | DSRDVR                          | QQYIF                           | LNII                             | IGSGS                      | FGKVHK             | VQSRT--NGRI--F-ACKEIDYAKM |
| <i>95593</i> /1-376       |       |     | MSDP     | TIH      | DAYDF                           | VAIC                            | GAGS                             | FGKVHK                     | VRSKE--DGQI--Y-ACK |                           |

|                           | 80                     | 90                                                    | 100                                                                                                             | 110                                                                                                      | 120                                                  | 130 |
|---------------------------|------------------------|-------------------------------------------------------|-----------------------------------------------------------------------------------------------------------------|----------------------------------------------------------------------------------------------------------|------------------------------------------------------|-----|
| <i>CAMKKMmu</i> ,/1-251   | E <b>G</b> -- K        | --- E <b>G</b> S M E N                                | ---                                                                                                             | E I A V L H K I K <b>HPN</b> I V A L D D I Y E S                                                         | -- <b>GGH</b> L Y L I M Q L V S G G E L F D          |     |
| <i>NrkCfa</i> ,/1-258     | --- K                  | --- <b>Q</b> A T Y A R S                              | ---                                                                                                             | E L H C L A A C T H F <b>G</b> I V K H Y D D F K S                                                       | -- E D K L L L I M E Y <b>G</b> S G G D L N K        |     |
| <i>Nrk6Cre</i> ,/1-257    | S A -- K               | --- K R D R C L Q                                     | ---                                                                                                             | E V T L L Q Q L D <b>HPN</b> I I Q M L D A F I D                                                         | -- E N M L I I F E W A <b>P</b> A G D L K R          |     |
| <i>Nek7simCel</i> ,/1-266 | D Q -- K               | --- A R Q D C L K                                     | ---                                                                                                             | E I D L L K Q L N H V N V I R Y Y A S F I D                                                              | -- N N Q L N I V L E L A E A G D M S R               |     |
| <i>NEK6Hs</i> ,/1-266     | D A -- K               | --- A R Q D C V K                                     | ---                                                                                                             | E I <b>G</b> L L K Q L N <b>HPN</b> I I K Y L D S F I E                                                  | -- D N E L N I V L E L A D A G D L S Q               |     |
| <i>NEK7Hs</i> ,/1-265     | D A -- K               | --- A R A D C I K                                     | ---                                                                                                             | E I D L L K Q L N <b>HPN</b> V I K Y Y A S F I E                                                         | -- D N E L N I V L E L A D A G D L S R               |     |
| <i>Nek82Cel</i> ,/1-264   | T E -- K               | --- E E N S I Q S                                     | ---                                                                                                             | E V N L L K K V Q <b>HP</b> L I I <b>G</b> Y I D S F I M                                                 | -- D N Q L <b>G</b> I V M <b>Q</b> Y A E G G T L E R |     |
| <i>NEK9Nercc1</i> ,/1-257 | S E -- K               | --- E R R D A L N                                     | ---                                                                                                             | E I V I L A L L Q <b>HDN</b> I I A Y Y N H F M D                                                         | -- N T T L L I E L E Y C N G G N L Y D               |     |
| <i>NRK16Tth</i> ,/1-256   | N D -- T               | --- E K R S A Q S                                     | ---                                                                                                             | E V T L L K V L V A P T I R Y Y E A F V Q                                                                | -- N D S I Y I V M E Y A K E G A L S D               |     |
| <i>NRK24Tth</i> ,/1-256   | D D -- <b>Q</b>        | --- <b>Q</b> K K M A Q Q                              | ---                                                                                                             | E I T L L K V L V A P S I I R Y Y E S F V E                                                              | -- N D S I H I I M E Y A K E G A L S D               |     |
| <i>Nek81Cel</i> ,/1-254   | D S -- S               | --- <b>Q</b> R R L A L N                              | ---                                                                                                             | E V S L L S R I E <b>HPN</b> I I A Y Y D S F E E                                                         | -- E <b>G</b> V L M I E M E Y A D G G T L A Q        |     |
| <i>Nek8simDme</i> ,/1-254 | S <b>P</b> -- <b>P</b> | --- <b>G</b> R D L A M N                              | ---                                                                                                             | E V D V F S K L H <b>HPN</b> I V S Y L <b>G</b> S F I K                                                  | -- D N T L L I E M E Y A D G G T L A Q               |     |
| <i>Fin1Spo</i> ,/1-278    | T R -- <b>Q</b>        | --- <b>E</b> K Q Y I A D                              | ---                                                                                                             | E V N I L R N L K <b>HPN</b> I V Q Y C <b>G</b> E E L N R S A Q V                                        | I N L Y M E Y C <b>G</b> H G D L A N                 |     |
| <i>TvSTEPK</i> /1-307     | D N -- K               | --- K K Q M L I N                                     | ---                                                                                                             | E V N A L R N I Q N E H V V <b>G</b> Y Y D R I V V R E K K L M Y                                         | I V M E Y C E K G D L Q Q                            |     |
| <i>TvAGCPK</i> /1-307     | S T -- H               | --- <b>E</b> K E M L V N                              | ---                                                                                                             | E C N I L K K L R N D N I V T Y Y D R I V D T S Q R T                                                    | L F L I M E Y C S G G D L Q K                        |     |
| <i>KIN3Sce</i> ,/1-323    | N S -- K               | --- <b>E</b> R Q Q L I A                              | ---                                                                                                             | E C S I L S Q L K H E N I V E F Y N W D F D E Q K E V L Y                                                | L Y M E Y C S R G D L S Q                            |     |
| <i>Nek2simDme</i> ,/1-263 | D E -- A               | --- K C D A L V S                                     | ---                                                                                                             | E I S V L R Q L Q <b>HPN</b> I V Q Y Y H H L V N R E A K S V Y                                           | I V M E C C A G G D L A Q                            |     |
| <i>Ng29678</i> /1-363     | S E -- K               | --- <b>E</b> K Q L I V T                              | ---                                                                                                             | E V N I L K D L E N K N I V K Y F N R Y I D K N K R K L Y                                                | I L M E C C E G G D L G K                            |     |
| <i>NIM1Ncr</i> ,/1-284    | S Q -- K               | --- E R E Q L H A                                     | ---                                                                                                             | E F S I L S T L R <b>HPN</b> I V <b>G</b> Y Y H R E H L K A T Q D L H                                    | L Y M E Y C G N G D L G R                            |     |
| <i>NIMAAnid</i> ,/1-285   | S T -- K               | --- E R E Q L T A                                     | ---                                                                                                             | E F N I L S S L R <b>HPN</b> I V A Y Y H R E H L K A S Q D L Y                                           | L Y M E Y C G G G D L S M                            |     |
| <i>NRK5Tth</i> ,/1-259    | N E -- K               | --- E R E N A V N                                     | ---                                                                                                             | E V R F L A S I N C R N I I S Y K Q A I Y D E <b>G</b> V N Q L C V                                       | I M E Y A E G G D L A R                              |     |
| <i>NRK4Tth</i> ,/1-257    | S A -- K               | --- <b>E</b> Q E N A I N                              | ---                                                                                                             | E V R F L A S L S <b>S</b> Q E I I <b>G</b> Y K E A F Y D E K T <b>G</b> L H I                           | I M E Y C A G G D L L N                              |     |
| <i>NRK2Tth</i> ,/1-257    | S E -- K               | --- <b>E</b> K D N A L N                              | ---                                                                                                             | E I R I L A S I A <b>HPN</b> M I A Y K D A F F D E S S H S L C                                           | I V M E L A V N G D L S K                            |     |
| <i>NRK31Ttha</i> ,/1-263  | K E -- K               | --- <b>E</b> K E N A L N                              | ---                                                                                                             | E V R I L A S L N D E F I V <b>G</b> Y K E A F I D E Q S Q I L C V                                       | M E Y A A G G D L Q G                                |     |
| <i>NRK1Tth</i> ,/1-259    | S T -- K               | --- <b>E</b> K E N A L N                              | ---                                                                                                             | E V R I L A S I K <b>S</b> D N I I S Y K E A F Y D E K S S T L C                                         | I M E F A T K G D V L Q                              |     |
| <i>NRK3Tth</i> ,/1-258    | S Y -- K               | --- <b>E</b> K E N A L N                              | ---                                                                                                             | E I R I L A S I N <b>S</b> P H I I R Y K D A F Y D N A S <b>G</b> C L C                                  | I V M E Y A E N G D L M A                            |     |
| <i>NRK7Tth</i> ,/1-257    | K Q -- R               | --- <b>D</b> K D N A L N                              | ---                                                                                                             | E V R I L A S I K N Q Y V I A Y K E A I Y D E Q S E C L F V                                              | I M E Y A A G G D L H Q                              |     |
| <i>NRK9Tth</i> ,/1-273    | N E -- K               | --- <b>E</b> K <b>G</b> N <b>S</b> L N                | ---                                                                                                             | E I R I L A S I K C D H I I E Y R D S F F D D Q S D T L C                                                | I V M E Y A G S G D L L Q                            |     |
| <i>13981c</i> /1-1109     | L V -- H               | --- <b>P</b> Q E P D F I                              | ---                                                                                                             | A L E R Y M Q L R <b>HP</b> C L L N I L D V Y H N K <b>P</b> A R K V V V I T E R                         | <b>S</b> P S H E L A D                               |     |
| <i>17231c</i> /1-1006     | D S -- <b>G</b>        | --- Y N <b>G</b> F D H A                              | ---                                                                                                             | S I K E L L S I V H P Y M L R V M E I I Y D Q E V Q K V Y V V T E L                                      | N S H N N L R Y                                      |     |
| <i>24321disc</i> /1-288   | T T -- K               | --- V C D L C K T                                     | ---                                                                                                             | <b>D</b> I T L <b>S</b> T Q V A <b>S</b> P F F A T V H E A T Y E A K S K K V F V L M E D F P M G T L N D |                                                      |     |
| <i>17250</i> /1-854       | <b>G</b> R -- <b>G</b> | --- R Y A L I R D                                     | ---                                                                                                             | L A R Q A H R L D H E S I T P L L E A F V D D E Q E C I F - L I S R G A G Q S L Y E                      |                                                      |     |
| <i>15409</i> /1-515       | D E -- S               | --- <b>D</b> R A T L R R R T <b>G</b> E Y C E F N N S | S T A V Q <b>P</b> D L L <b>S</b> P Y L A R L S H Y F N D D A S A L L T M <b>G</b> L <b>P</b> Y G V N - T L Y D |                                                                                                          |                                                      |     |
| <i>11775</i> /1-1618      | --- V                  | --- <b>P</b> N A R L R S                              | ---                                                                                                             | C M D A Y L Q L T C P H I I R L Q T Y S I D - - T A F T L V T D M T N G P S L R S                        |                                                      |     |
| <i>8445</i> /1-597        | D Q -- R               | --- <b>G</b> V E L I M R                              | ---                                                                                                             | E A N L L S R M K H I N V L <b>G</b> Y H D V V I D E V E K V I Y I F T E F C N K G D L F Q               |                                                      |     |
| <i>11311_mp</i> /1-367    | S E -- K               | --- <b>E</b> K K L L V H                              | ---                                                                                                             | E V N T L K E L S H E N I V S Y I D R F V E R E N A K M F I V M E Y C E N G D L A K                      |                                                      |     |
| <i>95593</i> /1-376       | S S -- K               | --- <b>E</b> K E L L V S                              | ---                                                                                                             | E V N L L R K L N <b>HPN</b> I V K Y I R R Y Q D K A A T L I Y I V M D Y C S K G D L S D                 |                                                      |     |

|                           | 140                           | 150                                     | 160 | 170                                                                         | 180 | 190 | 200 |
|---------------------------|-------------------------------|-----------------------------------------|-----|-----------------------------------------------------------------------------|-----|-----|-----|
| <i>CAMKKMmu</i> ,/1-251   | R I V E K G                   |                                         |     | F Y T E R D A S R L I F Q V L D A V K Y L H D L                             |     |     |     |
| <i>NrkCfa</i> ,/1-258     | Q I K Q R L                   | K E H L                                 |     | P F Q E Y E V G L L F Y Q I V L A L D E V H T R                             |     |     |     |
| <i>Nrk6Cre</i> ,/1-257    | L I K K T A                   | E Q G K                                 |     | T L D E P S I W T L F Y Q V T D G L R Y M H Q H                             |     |     |     |
| <i>Nek7simCel</i> ,/1-266 | M I K H F K                   | K G G R                                 |     | L I P E K T I W K Y F V Q L A R A L A H M H S K                             |     |     |     |
| <i>NEK6Hs</i> ,/1-266     | M I K Y F K                   | K Q K R                                 |     | L I P E R T V W K Y F V Q L C S A V E H M H S R                             |     |     |     |
| <i>NEK7Hs</i> ,/1-265     | M I K H F K                   | K Q K R                                 |     | L I P E R T V W K Y F V Q L C S A L E H M H S R                             |     |     |     |
| <i>Nek82Cel</i> ,/1-264   | L I N D Q R A I K D S N M R E |                                         |     | Y F P E K T V L D Y F T Q I L I A L N H M H Q K                             |     |     |     |
| <i>NEK9Nercc1</i> ,/1-257 | K I L R Q K                   | D K                                     |     | L F E E E M V V W Y L F Q I V S A V S C I H K A                             |     |     |     |
| <i>NRK16Tth</i> ,/1-256   | K I Q E H K                   | T K G I                                 |     | R I D E E T I L Y F T A Q I V I A L F F M H Q K                             |     |     |     |
| <i>NRK24Tth</i> ,/1-256   | K I T E H K                   | Q K G I                                 |     | P I D E E T V L Y F T A Q I I I S V L F M H S K                             |     |     |     |
| <i>Nek81Cel</i> ,/1-254   | M L S R T Q                   | N                                       |     | L L D E E Q I G D M M I Q M C S A V A Y L H E N                             |     |     |     |
| <i>Nek8simDme</i> ,/1-254 | I I A E R Q                   | G K L                                   |     | H F P E R Y I I A V F E Q I S S A I N Y M H S E                             |     |     |     |
| <i>Fin1Spo</i> ,/1-278    | L I Q R Y K                   | E E K K                                 |     | R F T E Q E V L K F F T Q L L L A L Y R C H Y G E N A P A C D S Q W P R E I |     |     |     |
| <i>TvSTEPK</i> /1-307     | L I R K T R                   | A D N D                                 |     | R I P E S A I W Q V L T D M C I A L D S C H P                               |     |     |     |
| <i>TvAGCPK</i> /1-307     | F I Q N S T                   | S                                       |     | P I G E N Q I W L S L S E L A L A L N E C H N G K E                         |     |     |     |
| <i>KIN3Sce</i> ,/1-323    | M I K H Y K                   | Q E H K                                 |     | Y I P E K I V W G I L A Q L L T A L Y K C H Y G V E L P T L T T I Y D R M K |     |     |     |
| <i>Nek2simDme</i> ,/1-263 | I V Q R A R                   | S Q R Q                                 |     | R F E E P Y I W R V L F Q L C R A L Q V C H N K I P N G                     |     |     |     |
| <i>Ng29678</i> /1-363     | F I Q S I K                   | K T S G                                 |     | K I E E A T V L K I F S E V C C A L K E C H T R K S G                       |     |     |     |
| <i>NIM1Ncr</i> ,/1-284    | V I R N L I                   | K N N Q                                 |     | Y A E E S F V W S I F S Q L V T A L Y R C H Y G V D P P E V G K T V L G L G |     |     |     |
| <i>NIMAAnid</i> ,/1-285   | V I K N L K                   | R T N K                                 |     | Y A E E D F V W R I L S Q L V T A L Y R C H Y G T D P A E V G S N L L G P A |     |     |     |
| <i>NRK5Tth</i> ,/1-259    | I I R H A S                   | K A G K                                 |     | Y I E E D M I W S Y A I Q M T I G I K A L H D L                             |     |     |     |
| <i>NRK4Tth</i> ,/1-257    | K I R N L K                   | K K N Q                                 |     | Y L D E K V V W L Y I I Q M I K G L K C L H D L                             |     |     |     |
| <i>NRK2Tth</i> ,/1-257    | K I D S A K                   | K R N S                                 |     | F V P E E E I W T V A L H M L R G L K A M H S K                             |     |     |     |
| <i>NRK31Ttha</i> ,/1-263  | K I T A N I                   | K S K T                                 |     | M F P E S E V W K A L I H M S K G L Q I L H Q M                             |     |     |     |
| <i>NRK1Tth</i> ,/1-259    | Q I S E K K                   | K K H S                                 |     | Y F E E N L I W K Y A A D M L L G L K S L H D M                             |     |     |     |
| <i>NRK3Tth</i> ,/1-258    | K L Q D Y K                   | K R N M                                 |     | F M D E A K I W K Y A A Q I L L G L K S L H D L                             |     |     |     |
| <i>NRK7Tth</i> ,/1-257    | Q V K S C I                   | K S K T                                 |     | Y L D E N Q I W I W T I Q M L Y G L K A L H D L                             |     |     |     |
| <i>NRK9Tth</i> ,/1-273    | K L K E Y K                   | L I N E K L L E D G Q N E T S E S Q M V |     | F M D E E L I W D Y F I Q C L K G L K C L H D L                             |     |     |     |
| <i>13981lc</i> /1-1109    | L I T N Y K                   | S S G T                                 |     | L I P E E Q I W A I L Y S V C A G L S Y C H S N S K H N C P K V P           |     |     |     |
| <i>17231lc</i> /1-1006    | M I D A Y W                   | K S R E                                 |     | Q I G E G T I I R I I G E L A E A L K Y Y H T G V R P G M L P S T           |     |     |     |
| <i>24321disc</i> /1-288   | Y L Y G L P                   | E D E                                   |     | F L P E Q T C W C L L A C L V E A I C Q L H E P S R M K D I E H R F T R     |     |     |     |
| <i>17250</i> /1-854       | Y S E E L C                   | F L Q V                                 |     | N L E E E V I I T I L V E L I N A I L Y V Y S T N R K T D F T D A L A S     |     |     |     |
| <i>15409</i> /1-515       | V M M A K A                   | Q S Y S                                 |     | N F T E E E V W R V V A A L C D A A R F M H S E E K P D T E L E             |     |     |     |
| <i>11775</i> /1-1618      | L I I K R R                   | I A Q Q                                 |     | W F T S V E I W L L I T Q L L E G V K A Y Q S F Y A                         |     |     |     |
| <i>8445</i> /1-597        | L I D K H R                   | Y P R T                                 |     | N I P E E R I W K L F G Q L L A L E Y C H C P T K E N F E L G E             |     |     |     |
| <i>11311_mp</i> /1-367    | Y I K R H K                   | T D R R                                 |     | Y I A E E K I W S V F V Q L L H A L N Y C H S I H S E D E S G V H           |     |     |     |
| <i>95593</i> /1-376       | Y V K M H K                   | K T N Q                                 |     | Y I S E D K I W S I F A Q L L I A L D Y C H S P N K P D S S G V G           |     |     |     |

|                           | 210                         | 220                             | 230 | 240                                                                             | 250 | 260 | 270 |
|---------------------------|-----------------------------|---------------------------------|-----|---------------------------------------------------------------------------------|-----|-----|-----|
| <i>CAMKKMmu</i> ,/1-251   |                             | G I V H R D L K P E N L L Y Y S |     | L D E D - S K                                                                   |     |     |     |
| <i>NrkCfa</i> ,/1-258     |                             | R M M H R D L K S A N I F       |     | L M P T - G I                                                                   |     |     |     |
| <i>Nrk6Cre</i> ,/1-257    |                             | R I M H R D I K P A N V L       |     | V G A N - G A                                                                   |     |     |     |
| <i>Nek7simCel</i> ,/1-266 |                             | R I M H R D I K P A N V F       |     | I T G N - G I                                                                   |     |     |     |
| <i>NEK6Hs</i> ,/1-266     |                             | R V M H R D I K P A N V F       |     | I T A T - G V                                                                   |     |     |     |
| <i>NEK7Hs</i> ,/1-265     |                             | R V M H R D I K P A N V F       |     | I T A T - G V                                                                   |     |     |     |
| <i>Nek82Cel</i> ,/1-264   |                             | N I V H R D L K P Q N I L       |     | M N R R K T V                                                                   |     |     |     |
| <i>NEK9Nercc1</i> ,/1-257 |                             | G I L H R D I K T L N I F       |     | L T K A - N L                                                                   |     |     |     |
| <i>NRK16Tth</i> ,/1-256   |                             | K I L H R D I K S Q N L F       |     | L T K E - N V                                                                   |     |     |     |
| <i>NRK24Tth</i> ,/1-256   |                             | N I L H R D I K T Q N L F       |     | L T K E - N I                                                                   |     |     |     |
| <i>Nek81Cel</i> ,/1-254   |                             | S V L H R D L K T A N V F       |     | L T R D - S F                                                                   |     |     |     |
| <i>Nek8simDme</i> ,/1-254 |                             | N I L H R D L K T A N V F       |     | L N R R - G I                                                                   |     |     |     |
| <i>Fin1Spo</i> ,/1-278    | F H P K Q                   | S V L H R D I K P A N I F       |     | L D E N - N S                                                                   |     |     |     |
| <i>TvSTEPK</i> /1-307     |                             | K M I H R D I K P G N I F       |     | I S G N - G H                                                                   |     |     |     |
| <i>TvAGCPK</i> /1-307     |                             | R I I H R D I K P G N I F       |     | I D S S - G H                                                                   |     |     |     |
| <i>KIN3Sce</i> ,/1-323    | P P V K G                   | K N I V I H R D L K P G N I F   |     | L S Y D - D S D Y N I N E Q V D G H E E V N S N Y Y R D H R V N S G K R G S P M |     |     |     |
| <i>Nek2simDme</i> ,/1-263 |                             | T I L H R D I K P A N I F       |     | L D A A - G N                                                                   |     |     |     |
| <i>Ng29678</i> /1-363     |                             | K V I H R D L K P G N I F       |     | L D K D - L N                                                                   |     |     |     |
| <i>NIM1Ncr</i> ,/1-284    | S T A R P - K P P S G G M T | I L H R D L K P E N V F         |     | L G E D - N S                                                                   |     |     |     |
| <i>NIMAAnid</i> ,/1-285   | P K P S G L K G K Q A Q M T | I L H R D L K P E N I F         |     | L G S D - N T                                                                   |     |     |     |
| <i>NRK5Tth</i> ,/1-259    |                             | N I L H R D L K A A N V F       |     | L D K Y Q T R                                                                   |     |     |     |
| <i>NRK4Tth</i> ,/1-257    |                             | N I L H R D F K C A N I M       |     | L T R D H K N                                                                   |     |     |     |
| <i>NRK2Tth</i> ,/1-257    |                             | K I L H R D L K C A N V F       |     | I S K Q - D E                                                                   |     |     |     |
| <i>NRK31Ttha</i> ,/1-263  |                             | Q I L H R D L K C A N V F       |     | L S L E - G V                                                                   |     |     |     |
| <i>NRK1Tth</i> ,/1-259    |                             | K I L H R D L K G A N V F       |     | I A E D - G S                                                                   |     |     |     |
| <i>NRK3Tth</i> ,/1-258    |                             | K I L H R D L K C A N I F       |     | L G A N - N K                                                                   |     |     |     |
| <i>NRK7Tth</i> ,/1-257    |                             | K I L H R D L K C A N I F       |     | L D S R - R N                                                                   |     |     |     |
| <i>NRK9Tth</i> ,/1-273    |                             | K I V H R D L K C A N I F       |     | I G D N - N I                                                                   |     |     |     |
| <i>13981lc</i> /1-1109    |                             | K L V H R H V S S F S I L       |     | I G E N - T S                                                                   |     |     |     |
| <i>17231lc</i> /1-1006    |                             | P N H Y R T L T P A S V L       |     | V T K D - G V                                                                   |     |     |     |
| <i>24321disc</i> /1-288   |                             | A I I H R Y I M P R R I F       |     | M V S E - T R                                                                   |     |     |     |
| <i>17250</i> /1-854       |                             | N L P S T G L D P L C I R       |     | L S S K - G R                                                                   |     |     |     |
| <i>15409</i> /1-515       |                             | E F A H L G I H P A N I F       |     | L Y A D G A R                                                                   |     |     |     |
| <i>11775</i> /1-1618      |                             | R V G A A A D T P P N L F       |     | L S P F - F                                                                     |     |     |     |
| <i>8445</i> /1-597        |                             | I V I H R D I K P A N I L       |     | I T N D - D V                                                                   |     |     |     |
| <i>11311_mp</i> /1-367    |                             | K V I H R D I K P G N V F       |     | L T Q D - G S                                                                   |     |     |     |
| <i>95593</i> /1-376       |                             | R V I H R D L K T A N V F       |     | L C E D - G S                                                                   |     |     |     |

|                           | 280        | 290                        | 300              | 310             | 320            | 330              | 340               |                   |
|---------------------------|------------|----------------------------|------------------|-----------------|----------------|------------------|-------------------|-------------------|
| <i>CAMKKMmu</i> ,/1-251   | IMISD      | FGLS                       | KMEDP            | GSVLS           | TACGTPGYVAP    | EVLAKP           | YSK--AVDCWSIGV    |                   |
| <i>NrkCfa</i> ,/1-258     | IKLGD      | FGFS                       | KQYND SVSLDVG    | SSFCGTPYYLAP    | ELWERKR        | YSK--            | KADMWSLGV         |                   |
| <i>Nrk6Cre</i> ,/1-257    | LKLG       | LGLG                       | RQLSEQ--TMEAF    | SKVGTPTYV       | SP EVVRGAG     | YDW--            | KSDVW SMGC        |                   |
| <i>Nek7simCel</i> ,/1-266 | VKLG       | LGLG                       | RFFSSK--TTAAH    | SLVGTPTYM       | SPERIQESG      | YNF--            | KSDLWSTGC         |                   |
| <i>NEK6Hs</i> ,/1-266     | VKLG       | LGLG                       | RFFSSE--TTAAH    | SLVGTPTYM       | SPERIHENG      | YNF--            | KSDIWSLGC         |                   |
| <i>NEK7Hs</i> ,/1-265     | VKLG       | LGLG                       | RFFSSK--TTAAH    | SLVGTPTYM       | SPERIHENG      | YNF--            | KSDIWSLGC         |                   |
| <i>Nek82Cel</i> ,/1-264   | LKLS       | FGIS                       | KELGT--KSAAS     | TVIGTPNYL       | SP EICESRP     | YNQ--            | KSDMWSLGC         |                   |
| <i>NEK9Nercc1</i> ,/1-257 | IKLGD      | YGLA                       | KKLNSE--YSMAE    | TLVGTPTYM       | SP ELCQGVK     | YNF--            | KSDIWA VGC        |                   |
| <i>NRK16Tth</i> ,/1-256   | VKLG       | FGIS                       | KALGTN--ADFTK    | TLVGTPTYF       | SP EVCAGQS     | YGD--            | KADIWA LGC        |                   |
| <i>NRK24Tth</i> ,/1-256   | VKLG       | FGIS                       | KELGT--NANAK     | TLVGTPTYF       | SP EVCSGEN     | YQG--            | KADIWA IGC        |                   |
| <i>Nek81Cel</i> ,/1-254   | VKIG       | FGIS                       | KIMGTETLAQ       | GAKTVVGT        | PTYYSPEMCSGVS  | YNE--            | KSDMWA LGC        |                   |
| <i>Nek8simDme</i> ,/1-254 | VKIG       | FGIS                       | KIMNT--KIHAQ     | TVLGTPTYF       | SP EMC ECKE    | YDN--            | KSDIWA LGC        |                   |
| <i>Fin1Spo</i> ,/1-278    | VKLG       | FGLS                       | KLLDNT--RVFTQ    | SYVGTPTYM       | SP EIRSSP      | YSA--            | KSDVWA LGC        |                   |
| <i>TvSTEPK</i> /1-307     | VKLG       | FGLA                       | REIE--DGAAS      | TYAGTPPYM       | SP ELISHQP     | YDE--            | KSDIWA LGC        |                   |
| <i>TvAGCPK</i> /1-307     | VKLG       | FGLA                       | KPIP--DGSTK      | TYLGTPLYM       | SP ELVSHHS     | YDD--            | KSDIWA LGC        |                   |
| <i>KIN3Sce</i> ,/1-323    | DY S Q V V | VKLG                       | FGLA             | KSL ETS--IQFAT  | TYVGTPTYM      | SP E V L M D Q P | Y S P --          | L S D I W S L G C |
| <i>Nek2simDme</i> ,/1-263 | AKLG       | FGLA                       | RMLRRD--QSFAA    | SFVGTPHYM       | SP ELVKGRK     | YDR--            | KSDVWA VGC        |                   |
| <i>Ng29678</i> /1-363     | VKLG       | FGLA                       | RILSDQ--SKFAH    | TRLGTPTYM       | PP ELLSDQLSDQG | YDE--            | SCDIWSLGC         |                   |
| <i>NIM1Ncr</i> ,/1-284    | VKLG       | FGLS                       | KVMQS--HDFAS     | TYVGTPFYM       | SP EICAAEK     | YTL--            | KSDIWSLGC         |                   |
| <i>NIMAAnid</i> ,/1-285   | VKLG       | FGLS                       | KLMHS--HDFAS     | TYVGTPFYM       | SP EICAAEK     | YTL--            | RSDIWA VGC        |                   |
| <i>NRK5Tth</i> ,/1-259    | AMLG       | LNVS                       | KKLQV--NGLLY     | TQTGTPTYA       | SP EVWKDKP     | YNN--            | KSDIWSLGC         |                   |
| <i>NRK4Tth</i> ,/1-257    | LKLG       | LNVS                       | KVAK--KGM        | LYTQTGTPTYA     | SP EVWRDKP     | YNS--            | KSDVWSLGC         |                   |
| <i>NRK2Tth</i> ,/1-257    | YKIG       | LNVS                       | KVAK--RGLVY      | TQTGTPTYA       | SP EVWRDEP     | YDS--            | S S D I W S F G C |                   |
| <i>NRK31Tth</i> ,/1-263   | YKLG       | LNVS                       | KVAK--KGLVY      | TQTGTPTYA       | SP EVWRDEP     | YDV--            | KSDIWSLGC         |                   |
| <i>NRK1Tth</i> ,/1-259    | LRLG       | LNVS                       | KVQK--RDFAY      | TQTGTPTYT       | SP EVWQNRP     | YDS--            | KCDVWSLGC         |                   |
| <i>NRK3Tth</i> ,/1-258    | VKLG       | LNVS                       | KIMK--RDLAY      | TQTGTPTYT       | SP EVWQNP      | YDS--            | KCDVW SMGC        |                   |
| <i>NRK7Tth</i> ,/1-257    | AKIG       | LNVS                       | KITQ--ANLAR      | TQVGTPTYT       | SP EVWKDQM     | YNN--            | KSDIWSLGC         |                   |
| <i>NRK9Tth</i> ,/1-273    | IKIG       | LNVS                       | KVTRRP--EQMAK    | TQTGTPTYTAP     | EVWKGLS        | YNY--            | KSDVWSLGC         |                   |
| <i>13981lc</i> /1-1109    | MLTK       | LRFP                       | DLFTLLDIR        | SISESPASHLVYMAP | EILRREK        | YTD--            | KADVWSLGC         |                   |
| <i>17231lc</i> /1-1006    | YKID       | SRIE                       | HILD--PGYMAKA    | SAKSVYTAP       | EVFEGAN        | PSE--            | RSDIWSLGC         |                   |
| <i>24321disc</i> /1-288   | CKLAD      | IGWS                       | RDL L SM--EGKMGY | IQGT LQYYAP     | ELIVNEG        | YGR--            | EVDIFALGC         |                   |
| <i>17250</i> /1-854       | ALVDYSA    | FAVK                       | --LAAQRHSA       | F T M A Y L C P | E V L H S R H  | SGEDRA           | R L N V S P L K M |                   |
| <i>15409</i> /1-515       | IRLGY      | PYICPTMS                   | FKNPGNYRA        | FQQLGEAHFMAP    | EFIEAGAK       | GSC--            | PCDIFSIGM         |                   |
| <i>11775</i> /1-1618      | ILISDEER   | MK L Q I T E F Y Q T L L L | PSVQR            | LYATSGVAP       | EVSKHLP        | ISA--            | SADIWMIGA         |                   |
| <i>8445</i> /1-597        | VKLAD      | FGFS                       | RSFNS--SDMLK     | TQLGTPSYTAP     | EVLNKT         | YNE--            | KADIWSLGC         |                   |
| <i>11311_mp</i> /1-367    | IKLGD      | FGLC                       | RTLGE--DSVAQ     | TNVGTPLYMA      | IEVLQKQS       | YTE--            | KADIWSLGC         |                   |
| <i>95593</i> /1-376       | IKLGD      | FGLC                       | RVLEQ--STMAK     | TNVGTPLYMA      | PELL ENKS      | YTE--            | KVDIWSLGC         |                   |



|                           | 420                     | 430                                     | 440                             | 450                                               | 460                                   | 470 | 480 |
|---------------------------|-------------------------|-----------------------------------------|---------------------------------|---------------------------------------------------|---------------------------------------|-----|-----|
| <i>CAMKKMmu</i> ,/1-251   | D F I R H L M E K D P E | --- K R F T C E Q A                     | ---                             | ---                                               | ---                                   | --- | --- |
| <i>NrkCfa</i> ,/1-258     | A L L D P L L S K D P E | --- D R P T T Q Q L L Q                 | ---                             | ---                                               | ---                                   | --- | --- |
| <i>Nrk6Cre</i> ,/1-257    | S L V G R M L Q I D P A | --- K R P E L E E V W T                 | ---                             | ---                                               | ---                                   | --- | --- |
| <i>Nek7simCel</i> ,/1-266 | D L V S R C I L P E A S | --- K R P E T S E V L Q                 | ---                             | ---                                               | ---                                   | --- | --- |
| <i>NEK6Hs</i> ,/1-266     | E L V S M C I C P D P H | --- Q R P D I G Y V H Q                 | ---                             | ---                                               | ---                                   | --- | --- |
| <i>NEK7Hs</i> ,/1-265     | Q L V N M C I N P D P E | --- K R P D V T Y V Y D                 | ---                             | ---                                               | ---                                   | --- | --- |
| <i>Nek82Cel</i> ,/1-264   | M L V E N L L K T H T D | --- K R P D V S Q L L S                 | ---                             | ---                                               | ---                                   | --- | --- |
| <i>NEK9Nercc1</i> ,/1-257 | Q M V H S C L D Q D P E | --- Q R P T A D E L L D                 | ---                             | ---                                               | ---                                   | --- | --- |
| <i>NRK16Tth</i> ,/1-256   | M L I T L M L N K D P L | --- K R P F I W D L V N                 | ---                             | ---                                               | ---                                   | --- | --- |
| <i>NRK24Tth</i> ,/1-256   | M L I T F M L Q K D P V | --- K R P S V W D L A K                 | ---                             | ---                                               | ---                                   | --- | --- |
| <i>Nek81Cel</i> ,/1-254   | M V I R E L L Q L D P Q | --- K R P S A P Q A L K                 | ---                             | ---                                               | ---                                   | --- | --- |
| <i>Nek8simDme</i> ,/1-254 | S L M S N L L Q V E A P | --- R R P T A S E V L                   | ---                             | ---                                               | ---                                   | --- | --- |
| <i>Fin1Spo</i> ,/1-278    | L L I R H C L E V N S D | --- L R P T T Y Q L L R                 | ---                             | ---                                               | ---                                   | --- | --- |
| <i>TvSTEPK</i> /1-307     | E V I Q S M M M K K P Q | --- E R P T V K Q L L E                 | ---                             | ---                                               | ---                                   | --- | --- |
| <i>TvAGCPK</i> /1-307     | K V I S S M L D K D P S | --- K R P S A S D I L Q                 | ---                             | ---                                               | ---                                   | --- | --- |
| <i>KIN3Sce</i> ,/1-323    | A I I H S M I D V N L R | --- T R P S T F E L L Q                 | ---                             | ---                                               | ---                                   | --- | --- |
| <i>Nek2simDme</i> ,/1-263 | E I I A F M L A V D H E | --- Q R P G I E V I I R                 | ---                             | ---                                               | ---                                   | --- | --- |
| <i>Ng29678</i> /1-363     | E L I N R M I C V D P K | --- K R I S I V E I C E                 | ---                             | ---                                               | ---                                   | --- | --- |
| <i>NIM1Ncr</i> ,/1-284    | A T I K D C L R V N P D | --- R R P D T A T L L N                 | ---                             | ---                                               | ---                                   | --- | --- |
| <i>NIMAAnid</i> ,/1-285   | N V I A S C L R V N P D | --- H R P D T A T L I N                 | ---                             | ---                                               | ---                                   | --- | --- |
| <i>NRK5Tth</i> ,/1-259    | L F I A Q L L R V N P E | --- Q R P N C D E I L K                 | ---                             | ---                                               | ---                                   | --- | --- |
| <i>NRK4Tth</i> ,/1-257    | D F L S L C L Q V N P K | --- M R L T T S E L L E                 | ---                             | ---                                               | ---                                   | --- | --- |
| <i>NRK2Tth</i> ,/1-257    | K F I A L C L Q V S V   | --- Q R P S V T Q L L N                 | ---                             | ---                                               | ---                                   | --- | --- |
| <i>NRK31Ttha</i> ,/1-263  | R M L T M L L K V N P K | --- D R P S C E Q I L S                 | ---                             | ---                                               | ---                                   | --- | --- |
| <i>NRK1Tth</i> ,/1-259    | K F I E S C L K V E P K | --- M R S S V E S L L N                 | ---                             | ---                                               | ---                                   | --- | --- |
| <i>NRK3Tth</i> ,/1-258    | D F I N L C L R K N P K | --- Q R P S V N S L L E                 | ---                             | ---                                               | ---                                   | --- | --- |
| <i>NRK7Tth</i> ,/1-257    | N L I S Q C L N I N Q I | --- T R P D C D Q L L N                 | ---                             | ---                                               | ---                                   | --- | --- |
| <i>NRK9Tth</i> ,/1-273    | F V I S Q C L L Q N P K | --- L R P G C D Q L L K                 | ---                             | ---                                               | ---                                   | --- | --- |
| <i>13981lc</i> /1-1109    | A L V N K M L T F N E K | --- E R I S S H E I L L W P             | E M Q T V A T L V S G I P       | A R T N S Q L M A T I R G N V E S G               | D D L R Q S T T D L L                 | --- | --- |
| <i>17231lc</i> /1-1006    | D L I R R M L C I D P R | --- S R A S V T Y I C G L E P           | V V N I M T E F G Y K Q M A P   | E N R D R Y Q E D S G                             | S F A Q K W R E S F R A S Q V         | --- | --- |
| <i>24321disc</i> /1-288   | N L V S S M L N P D P K | --- K R P T A F E M R T                 | ---                             | ---                                               | ---                                   | --- | --- |
| <i>17250</i> /1-854       | R V L T W L T N P C N N | --- S R P Y L D E V L A H P             | F I F G F M V K S G             | S R E N E R V F R N A L G                         | S T Q L I L S A N M N N V E Y V R A L | --- | --- |
| <i>15409</i> /1-515       | D L I N S M L S F D S   | --- A R P K A E Q L C A S G             | K I A Q C I A E N G D A P       | T M A P P K M T R D I V Q                         | P P S G L T D L M I A A R D G         | --- | --- |
| <i>11775</i> /1-1618      | S L L S C M L I I N P D | --- K R P P V E L L D Y A L L H T       | P A L V Q P G S P G S S L S R P | E D G H V P R E K G G                             | N D A A I Q S S I I V                 | --- | --- |
| <i>8445</i> /1-597        | E L V D S M M I V D Y T | --- Q R P S A A Q L I R H R K F I E H G | V I T A D Y L N T N P           | T E E I D D K A K M I A E L K M C L K M K Q Q E V | ---                                   | --- | --- |
| <i>11311_mp</i> /1-367    | A A I D L M L N P N P S | --- A R P S A T D I L Q                 | ---                             | ---                                               | ---                                   | --- | --- |
| <i>95593</i> /1-376       | R I I D M M L I K E P E | --- K R P S T T E L I Q                 | ---                             | ---                                               | ---                                   | --- | --- |



560 570 580 590 600 610

|                   |                                                                                                                                           |
|-------------------|-------------------------------------------------------------------------------------------------------------------------------------------|
| CAMKKMmu,/1-251   | -----                                                                                                                                     |
| NrkCfa,/1-258     | -----                                                                                                                                     |
| Nrk6Cre,/1-257    | -----                                                                                                                                     |
| Nek7simCel,/1-266 | -----                                                                                                                                     |
| NEK6Hs,/1-266     | -----                                                                                                                                     |
| NEK7Hs,/1-265     | -----                                                                                                                                     |
| Nek82Cel,/1-264   | -----                                                                                                                                     |
| NEK9Nercc1,/1-257 | -----                                                                                                                                     |
| NRK16Tth,/1-256   | -----                                                                                                                                     |
| NRK24Tth,/1-256   | -----                                                                                                                                     |
| Nek81Cel,/1-254   | -----                                                                                                                                     |
| Nek8simDme,/1-254 | -----                                                                                                                                     |
| Fin1Spo,/1-278    | -----                                                                                                                                     |
| TvSTEPK/1-307     | -----                                                                                                                                     |
| TvAGCPK/1-307     | -----                                                                                                                                     |
| KIN3Sce,/1-323    | -----                                                                                                                                     |
| Nek2simDme,/1-263 | -----                                                                                                                                     |
| Ng29678/1-363     | -----                                                                                                                                     |
| NIM1Ncr,/1-284    | -----                                                                                                                                     |
| NIMAAnid,/1-285   | -----                                                                                                                                     |
| NRK5Tth,/1-259    | -----                                                                                                                                     |
| NRK4Tth,/1-257    | -----                                                                                                                                     |
| NRK2Tth,/1-257    | -----                                                                                                                                     |
| NRK31Ttha,/1-263  | -----                                                                                                                                     |
| NRK1Tth,/1-259    | -----                                                                                                                                     |
| NRK3Tth,/1-258    | -----                                                                                                                                     |
| NRK7Tth,/1-257    | -----                                                                                                                                     |
| NRK9Tth,/1-273    | -----                                                                                                                                     |
| 13981lc/1-1109    | -----                                                                                                                                     |
| 17231lc/1-1006    | -----                                                                                                                                     |
| 24321disc/1-288   | -----                                                                                                                                     |
| 17250/1-854       | -----                                                                                                                                     |
| 15409/1-515       | -----                                                                                                                                     |
| 11775/1-1618      | E I G V L T G E G Y S P L H L A L L L N H I Q L A K Y L D A S Y D L Q F L H G V E L W V D E H G V S N L M R C V C E R N L V G V Y Y Y S D |
| 8445/1-597        | -----                                                                                                                                     |
| 11311_mp/1-367    | -----                                                                                                                                     |
| 95593/1-376       | -----                                                                                                                                     |

630 640 650 660 670 680

|                   |                                                                                                                                                   |
|-------------------|---------------------------------------------------------------------------------------------------------------------------------------------------|
| CAMKKMmu,/1-251   | -----                                                                                                                                             |
| NrkCfa,/1-258     | -----                                                                                                                                             |
| Nrk6Cre,/1-257    | -----                                                                                                                                             |
| Nek7simCel,/1-266 | -----                                                                                                                                             |
| NEK6Hs,/1-266     | -----                                                                                                                                             |
| NEK7Hs,/1-265     | -----                                                                                                                                             |
| Nek82Cel,/1-264   | -----                                                                                                                                             |
| NEK9Nercc1,/1-257 | -----                                                                                                                                             |
| NRK16Tth,/1-256   | -----                                                                                                                                             |
| NRK24Tth,/1-256   | -----                                                                                                                                             |
| Nek81Cel,/1-254   | -----                                                                                                                                             |
| Nek8simDme,/1-254 | -----                                                                                                                                             |
| Fin1Spo,/1-278    | -----                                                                                                                                             |
| TvSTEPK/1-307     | -----                                                                                                                                             |
| TvAGCPK/1-307     | -----                                                                                                                                             |
| KIN3Sce,/1-323    | -----                                                                                                                                             |
| Nek2simDme,/1-263 | -----                                                                                                                                             |
| Ng29678/1-363     | -----                                                                                                                                             |
| NIM1Ncr,/1-284    | -----                                                                                                                                             |
| NIMAAnid,/1-285   | -----                                                                                                                                             |
| NRK5Tth,/1-259    | -----                                                                                                                                             |
| NRK4Tth,/1-257    | -----                                                                                                                                             |
| NRK2Tth,/1-257    | -----                                                                                                                                             |
| NRK31Ttha,/1-263  | -----                                                                                                                                             |
| NRK1Tth,/1-259    | -----                                                                                                                                             |
| NRK3Tth,/1-258    | -----                                                                                                                                             |
| NRK7Tth,/1-257    | -----                                                                                                                                             |
| NRK9Tth,/1-273    | -----                                                                                                                                             |
| 13981lc/1-1109    | -----                                                                                                                                             |
| 17231lc/1-1006    | -----                                                                                                                                             |
| 24321disc/1-288   | -----                                                                                                                                             |
| 17250/1-854       | -----                                                                                                                                             |
| 15409/1-515       | -----                                                                                                                                             |
| 11775/1-1618      | KQQK LQDYD <b>G</b> KTAL I KAVLN YNE <b>G</b> <b>L</b> <b>P</b> <b>A</b> <b>G</b> QEDVNLA I I RLLRLHEAR IQDKR <b>G</b> RTALMYAAEC <b>G</b> YLAAID |
| 8445/1-597        | -----                                                                                                                                             |
| 11311_mp/1-367    | -----                                                                                                                                             |
| 95593/1-376       | -----                                                                                                                                             |

KQQK LQDYD **G**KTAL I KAVLN YNE **G** **L** **P** **A** **G**QEDVNLA I I RLLRLHEAR IQDKR **G**RTALMYAAEC **G**YLAAID

700 710 720 730 740 750

CAMKKMmu,/1-251  
 Nrkcfa,/1-258  
 Nrkc6Cre,/1-257  
 Nek7simCel,/1-266  
 NEK6Hs,/1-266  
 NEK7Hs,/1-265  
 Nek82Cel,/1-264  
 NEK9Nercc1,/1-257  
 NRK16Tth,/1-256  
 NRK24Tth,/1-256  
 Nek81Cel,/1-254  
 Nek8simDme,/1-254  
 Fin1Spo,/1-278  
 TvSTEPK/1-307  
 TvAGCPK/1-307  
 KIN3Sce,/1-323  
 Nek2simDme,/1-263  
 Ng29678/1-363  
 NIM1Ncr,/1-284  
 NIMAAnid,/1-285  
 NRK5Tth,/1-259  
 NRK4Tth,/1-257  
 NRK2Tth,/1-257  
 NRK31Ttha,/1-263  
 NRK1Tth,/1-259  
 NRK3Tth,/1-258  
 NRK7Tth,/1-257  
 NRK9Tth,/1-273  
 13981lc/1-1109  
 17231lc/1-1006  
 24321disc/1-288  
 17250/1-854  
 15409/1-515  
 11775/1-1618  
 8445/1-597  
 11311\_mp/1-367  
 95593/1-376

V L S G S E A G M R D N E G H N S L E M A F S N R K L E A A R R M L L L E P V P H S C P D R Q G L T D L M K A C I E E D A F S L F C H M T

770 780 790 800 810 820

|                   |                                                                       |
|-------------------|-----------------------------------------------------------------------|
| CAMKKMmu,/1-251   | -----                                                                 |
| NrkCfa,/1-258     | -----                                                                 |
| Nrk6Cre,/1-257    | -----                                                                 |
| Nek7simCel,/1-266 | -----                                                                 |
| NEK6Hs,/1-266     | -----                                                                 |
| NEK7Hs,/1-265     | -----                                                                 |
| Nek82Cel,/1-264   | -----                                                                 |
| NEK9Nercc1,/1-257 | -----                                                                 |
| NRK16Tth,/1-256   | -----                                                                 |
| NRK24Tth,/1-256   | -----                                                                 |
| Nek81Cel,/1-254   | -----                                                                 |
| Nek8simDme,/1-254 | -----                                                                 |
| Fin1Spo,/1-278    | -----                                                                 |
| TvSTEPK/1-307     | -----                                                                 |
| TvAGCPK/1-307     | -----                                                                 |
| KIN3Sce,/1-323    | -----                                                                 |
| Nek2simDme,/1-263 | -----                                                                 |
| Ng29678/1-363     | -----                                                                 |
| NIM1Ncr,/1-284    | -----                                                                 |
| NIMAAnid,/1-285   | -----                                                                 |
| NRK5Tth,/1-259    | -----                                                                 |
| NRK4Tth,/1-257    | -----                                                                 |
| NRK2Tth,/1-257    | -----                                                                 |
| NRK31Ttha,/1-263  | -----                                                                 |
| NRK1Tth,/1-259    | -----                                                                 |
| NRK3Tth,/1-258    | -----                                                                 |
| NRK7Tth,/1-257    | -----                                                                 |
| NRK9Tth,/1-273    | -----                                                                 |
| 13981lc/1-1109    | -----                                                                 |
| 17231lc/1-1006    | -----                                                                 |
| 24321disc/1-288   | -----                                                                 |
| 17250/1-854       | -----                                                                 |
| 15409/1-515       | -----                                                                 |
| 11775/1-1618      | QTRATDINGNTALMHCVIHDRPEFIPELSEEYRMINRITGHSAMMLAVQLERRACFEALIKHESGLKSS |
| 8445/1-597        | -----                                                                 |
| 11311_mp/1-367    | -----                                                                 |
| 95593/1-376       | -----                                                                 |















|                   | 1320                                                                                                                                      | 1330 | 1340                                                                          | 1350 | 1360                                                                                            | 1370              |                 |
|-------------------|-------------------------------------------------------------------------------------------------------------------------------------------|------|-------------------------------------------------------------------------------|------|-------------------------------------------------------------------------------------------------|-------------------|-----------------|
| CAMKKMmu,/1-251   |                                                                                                                                           |      |                                                                               |      |                                                                                                 |                   |                 |
| NrkCfa,/1-258     |                                                                                                                                           |      |                                                                               |      |                                                                                                 |                   | T E F M         |
| Nrk6Cre,/1-257    |                                                                                                                                           |      |                                                                               |      |                                                                                                 |                   | I               |
| Nek7simCel,/1-266 |                                                                                                                                           |      |                                                                               |      |                                                                                                 | V A E H M N N Y F |                 |
| NEK6Hs,/1-266     |                                                                                                                                           |      |                                                                               |      |                                                                                                 | V A K Q M H I W M |                 |
| NEK7Hs,/1-265     |                                                                                                                                           |      |                                                                               |      |                                                                                                 |                   | V A K R M       |
| Nek82Cel,/1-264   |                                                                                                                                           |      |                                                                               |      |                                                                                                 |                   | D P L V         |
| NEK9Nercc1,/1-257 |                                                                                                                                           |      |                                                                               |      |                                                                                                 |                   | R P L L         |
| NRK16Tth,/1-256   |                                                                                                                                           |      |                                                                               |      |                                                                                                 |                   | I P I I         |
| NRK24Tth,/1-256   |                                                                                                                                           |      |                                                                               |      |                                                                                                 |                   | I P I I         |
| Nek81Cel,/1-254   |                                                                                                                                           |      |                                                                               |      |                                                                                                 |                   | M L             |
| Nek8simDme,/1-254 |                                                                                                                                           |      |                                                                               |      |                                                                                                 |                   | V Y W I         |
| Fin1Spo,/1-278    |                                                                                                                                           |      |                                                                               |      |                                                                                                 |                   | S P I L         |
| TvSTEPK/1-307     |                                                                                                                                           |      | N K Y V K L Y L Q M E M I L N E R A R V Q A D T A R L I K K Q E Q L K E E Y N |      |                                                                                                 |                   | R L N Q K A G   |
| TvAGCPK/1-307     |                                                                                                                                           |      | V R N V A L T V K I E K T K K L Y R A L K H E N E K L L T K R K E L E E E N N |      |                                                                                                 |                   | Q L K K Q L A   |
| KIN3Sce,/1-323    |                                                                                                                                           |      |                                                                               |      |                                                                                                 |                   | D I Q I R       |
| Nek2simDme,/1-263 |                                                                                                                                           |      |                                                                               |      |                                                                                                 |                   | H P L V         |
| Ng29678/1-363     | T S I V R F N I F D T Y I K Q R Y K I L K E K E K A L E K R E Q F I K K K E E K L E E K E K Q L E K E R                                   |      |                                                                               |      |                                                                                                 |                   | L A F L K       |
| NIM1Ncr,/1-284    |                                                                                                                                           |      |                                                                               |      |                                                                                                 |                   | L P I V         |
| NIMAAnid,/1-285   |                                                                                                                                           |      |                                                                               |      |                                                                                                 |                   | T P V I         |
| NRK5Tth,/1-259    |                                                                                                                                           |      |                                                                               |      |                                                                                                 |                   | F S V I         |
| NRK4Tth,/1-257    |                                                                                                                                           |      |                                                                               |      |                                                                                                 |                   | T P Y           |
| NRK2Tth,/1-257    |                                                                                                                                           |      |                                                                               |      |                                                                                                 |                   | N V L L         |
| NRK31Ttha,/1-263  |                                                                                                                                           |      |                                                                               |      |                                                                                                 |                   | N P I V Q       |
| NRK1Tth,/1-259    |                                                                                                                                           |      |                                                                               |      |                                                                                                 |                   | H K C I M       |
| NRK3Tth,/1-258    |                                                                                                                                           |      |                                                                               |      |                                                                                                 |                   | F Q G L L       |
| NRK7Tth,/1-257    |                                                                                                                                           |      |                                                                               |      |                                                                                                 |                   | L P I I         |
| NRK9Tth,/1-273    |                                                                                                                                           |      |                                                                               |      |                                                                                                 |                   | L P             |
| 13981lc/1-1109    | N G T V S A L G N T I I T R P N A E G D K L E E I R I L D D E Q M R A E E E L R N Q E R I E S D I E M T I K T H N D M V A N D S T         |      |                                                                               |      |                                                                                                 |                   | P L M V         |
| 17231lc/1-1006    | M I N I G Q G I Q S T L Y P G Q A E G I T S S K I L N S T Y F P N F P G Q I A Q F R A A Y D S R I T P E D E N M H I T D P D G T T         |      |                                                                               |      |                                                                                                 |                   | P L M K         |
| 24321disc/1-288   |                                                                                                                                           |      |                                                                               |      |                                                                                                 |                   | I P E I A       |
| 17250/1-854       |                                                                                                                                           |      |                                                                               |      | T A L M L A C E F H Q L H I A N S L I Q Y E A G M R D S S G Y T A L                             |                   | H R A A         |
| 15409/1-515       |                                                                                                                                           |      |                                                                               |      | M Y A A Q N G H A D C V S L L H E E F G M Q R R D G A T A L F T A V F W N R                     |                   |                 |
| 11775/1-1618      | L S D T R A Y D L L A A F H S S N Y R Q L K E A L Q S N D I Q S M K A F K E L A D S F Q A V A L N I E Y L V L P D A V F D D N G N         |      |                                                                               |      |                                                                                                 |                   | S Q L H         |
| 8445/1-597        | E S N N D A V E K L R A E L S L Q S M R V K Q L E A E N S E L R S Q N T I L T N K I L K L E E A A R R V A Q A Q S A I A S D G M T A L M R |      |                                                                               |      |                                                                                                 |                   |                 |
| 11311_mp/1-367    |                                                                                                                                           |      |                                                                               |      | H S R I I E M N E R I K A M P A Y A A Q A                                                       |                   | P P E I P K S A |
| 95593/1-376       |                                                                                                                                           |      |                                                                               |      | L P V I A K L L Q G L A Y D P A R N C R G L Q R V E Q M T P V D R A M G G N L R A P S R G M A P |                   |                 |

|                   | 1390                                                                                                                                      | 1400 | 1410 | 1420 | 1430 | 1440 |
|-------------------|-------------------------------------------------------------------------------------------------------------------------------------------|------|------|------|------|------|
| CAMKKMmu,/1-251   | -                                                                                                                                         | -    | -    | -    | -    | -    |
| NrkCfa,/1-258     | -                                                                                                                                         | -    | -    | -    | -    | -    |
| Nrk6Cre,/1-257    | -                                                                                                                                         | -    | -    | -    | -    | -    |
| Nek7simCel,/1-266 | -                                                                                                                                         | -    | -    | -    | -    | -    |
| NEK6Hs,/1-266     | -                                                                                                                                         | -    | -    | -    | -    | -    |
| NEK7Hs,/1-265     | HAC                                                                                                                                       | -    | -    | -    | -    | -    |
| Nek82Cel,/1-264   | -                                                                                                                                         | -    | -    | -    | -    | -    |
| NEK9Nercc1,/1-257 | -                                                                                                                                         | -    | -    | -    | -    | -    |
| NRK16Tth,/1-256   | -                                                                                                                                         | -    | -    | -    | -    | -    |
| NRK24Tth,/1-256   | -                                                                                                                                         | -    | -    | -    | -    | -    |
| Nek81Cel,/1-254   | -                                                                                                                                         | -    | -    | -    | -    | -    |
| Nek8simDme,/1-254 | -                                                                                                                                         | -    | -    | -    | -    | -    |
| Fin1Spo,/1-278    | -                                                                                                                                         | -    | -    | -    | -    | -    |
| TvSTEPK/1-307     | R V F F N E                                                                                                                               | -    | -    | -    | -    | -    |
| TvAGCPK/1-307     | -                                                                                                                                         | -    | -    | -    | -    | -    |
| KIN3Sce,/1-323    | T A R                                                                                                                                     | -    | -    | -    | -    | -    |
| Nek2simDme,/1-263 | -                                                                                                                                         | -    | -    | -    | -    | -    |
| Ng29678/1-363     | E K T E F E K Q K Q T K S V D M T S G L S P L T E L N K E N I Y Q T F K I                                                                 | -    | -    | -    | -    | -    |
| NIM1Ncr,/1-284    | -                                                                                                                                         | -    | -    | -    | -    | -    |
| NIMAAnid,/1-285   | -                                                                                                                                         | -    | -    | -    | -    | -    |
| NRK5Tth,/1-259    | -                                                                                                                                         | -    | -    | -    | -    | -    |
| NRK4Tth,/1-257    | -                                                                                                                                         | -    | -    | -    | -    | -    |
| NRK2Tth,/1-257    | -                                                                                                                                         | -    | -    | -    | -    | -    |
| NRK31Ttha,/1-263  | R N G G E                                                                                                                                 | -    | -    | -    | -    | -    |
| NRK1Tth,/1-259    | -                                                                                                                                         | -    | -    | -    | -    | -    |
| NRK3Tth,/1-258    | -                                                                                                                                         | -    | -    | -    | -    | -    |
| NRK7Tth,/1-257    | -                                                                                                                                         | -    | -    | -    | -    | -    |
| NRK9Tth,/1-273    | -                                                                                                                                         | -    | -    | -    | -    | -    |
| 13981lc/1-1109    | A A S A D N V D Q V R F L L P M H G G E T T T K G I T A L M M A A S A G H V R S V K L L I P K E G R M Q D K D G M T A L M Y A A H F G K L | -    | -    | -    | -    | -    |
| 17231lc/1-1006    | A V I R D D M R L V Q K Y L P T Q C R I A N D R G V T A L M L A A Y F D N F D A I Q L L L D K E S K T Q D S A G M T A L M Y A A H K G N T | -    | -    | -    | -    | -    |
| 24321disc/1-288   | N I L R G E L S A                                                                                                                         | -    | -    | -    | -    | -    |
| 17250/1-854       | A L G L V S A V K L L I T T K E C G L R D P K G Q T A L M F A A Q Y G H S K C V E L L R K E K E A G L V T D K G W S A L M S A I T N G H T | -    | -    | -    | -    | -    |
| 15409/1-515       | C E C V K V L A P T E A I I S T N D R Y W Q G E R Y T A A M E A A R W G R P E C L Q E L L G Y I D K Y T T D N N G N D V A Y Y A M H P W E | -    | -    | -    | -    | -    |
| 11775/1-1618      | I A A L A A D T R L A A A F V H L H S L R N K K G E T A L M L A A R S G S E A V V D I L L N Y E A E M Q D N N K M T A T E H S I V S G T F | -    | -    | -    | -    | -    |
| 8445/1-597        | A V Q M N D I A G I K A H I A T D A G K K N R K G K T A L M M C S D T G K T E A A A L L I P Y E A G T K M S D G T T A L I L A A I A G H V | -    | -    | -    | -    | -    |
| 11311_mp/1-367    | P P G G G H A Q - - - - R E R E L R E W E E R L N T K E Q S L R A R E E H V D R T L A A L N A G T Y K G Y - - - - -                       | -    | -    | -    | -    | -    |
| 95593/1-376       | P P S A G Y K P V N G R Y S D G D L D A W E D R L K E R E A A L A N W E D A I S E K E T N L K E R L A K A G L R - - - - -                 | -    | -    | -    | -    | -    |

|                   | 1460             | 1470     | 1480        | 1490         | 1500                     | 1510                            |            |
|-------------------|------------------|----------|-------------|--------------|--------------------------|---------------------------------|------------|
| CAMKKMmu,/1-251   | -----            | -----    | -----       | -----        | -----                    | -----                           |            |
| NrkCfa,/1-258     | -----            | -----    | -----       | -----        | -----                    | -----                           |            |
| Nrk6Cre,/1-257    | -----            | -----    | -----       | -----        | -----                    | -----                           |            |
| Nek7simCel,/1-266 | -----            | -----    | -----       | -----        | -----                    | -----                           |            |
| NEK6Hs,/1-266     | -----            | -----    | -----       | -----        | -----                    | -----                           |            |
| NEK7Hs,/1-265     | -----            | -----    | -----       | -----        | -----                    | -----                           |            |
| Nek82Cel,/1-264   | -----            | -----    | -----       | -----        | -----                    | -----                           |            |
| NEK9Nercc1,/1-257 | -----            | -----    | -----       | -----        | -----                    | -----                           |            |
| NRK16Tth,/1-256   | -----            | -----    | -----       | -----        | -----                    | -----                           |            |
| NRK24Tth,/1-256   | -----            | -----    | -----       | -----        | -----                    | -----                           |            |
| Nek81Cel,/1-254   | -----            | -----    | -----       | -----        | -----                    | -----                           |            |
| Nek8simDme,/1-254 | -----            | -----    | -----       | -----        | -----                    | -----                           |            |
| Fin1Spo,/1-278    | -----            | -----    | -----       | -----        | -----                    | -----                           |            |
| TvSTEPK/1-307     | -----            | -----    | -----       | -----        | -----                    | -----                           |            |
| TvAGCPK/1-307     | -----            | -----    | -----       | -----        | -----                    | -----                           |            |
| KIN3Sce,/1-323    | -----            | -----    | -----       | -----        | -----                    | -----                           |            |
| Nek2simDme,/1-263 | -----            | -----    | -----       | -----        | -----                    | -----                           |            |
| Ng29678/1-363     | -----            | -----    | -----       | -----        | -----                    | -----                           |            |
| NIM1Ncr,/1-284    | -----            | -----    | -----       | -----        | -----                    | -----                           |            |
| NIMAAnid,/1-285   | -----            | -----    | -----       | -----        | -----                    | -----                           |            |
| NRK5Tth,/1-259    | -----            | -----    | -----       | -----        | -----                    | -----                           |            |
| NRK4Tth,/1-257    | -----            | -----    | -----       | -----        | -----                    | -----                           |            |
| NRK2Tth,/1-257    | -----            | -----    | -----       | -----        | -----                    | -----                           |            |
| NRK31Ttha,/1-263  | -----            | -----    | -----       | -----        | -----                    | -----                           |            |
| NRK1Tth,/1-259    | -----            | -----    | -----       | -----        | -----                    | -----                           |            |
| NRK3Tth,/1-258    | -----            | -----    | -----       | -----        | -----                    | -----                           |            |
| NRK7Tth,/1-257    | -----            | -----    | -----       | -----        | -----                    | -----                           |            |
| NRK9Tth,/1-273    | -----            | -----    | -----       | -----        | -----                    | -----                           |            |
| 13981lc/1-1109    | EAVKELVEAEHNKVN  | SAG      | LTALMIAAEF  | GNVDIVNFLKTY | ESKKFSASRETAMMRAAKL      | GHVDIVKELL                      |            |
| 17231lc/1-1006    | NSVVQLYTHEARMVT  | GK       | GVTALMIAAEC | GWVDIVRTLMP  | PREARLRDDFG              | NNTALIYACKAGRASVVQELL           |            |
| 24321disc/1-288   | -----            | -----    | -----       | -----        | -----                    | -----                           |            |
| 17250/1-854       | EAAKLLIDYEG      | HLTLNM   | GYTP        | LMCAVEHKQYEV | IDLLKHSQARKTIAAESEEDSWHN | GATALMLAAYSN                    |            |
| 15409/1-515       | HVSADKSSRVREVLNL | -----    | -----       | -----        | -----                    | -----                           |            |
| 11775/1-1618      | HKVNLNLYTREKAF   | LVNECELS | P           | LMLAVLE      | GDIKTVSAG                | LKYAKLRTSSGMTALHMAIYLRQQAHANLLK |            |
| 8445/1-597        | DIVNILKKKE       | GKMQARQ  | G           | DTALINA AVT  | GHA EVVRALVEIEA          | GLRMDDGRAAIHNAAYK               | GHLECVKILL |
| 11311_mp/1-367    | -----            | -----    | -----       | -----        | -----                    | -----                           |            |
| 95593/1-376       | -----            | -----    | -----       | -----        | -----                    | -----                           |            |
