# Supplementary material for: Novel Structural Components of the Ventral Disc and Lateral Crest in Giardia intestinalis
Source: PubMed Central journal article supplement (PMC3243723; doi:10.1371/journal.pntd.0001442), 2011-12-20
Supplement: pntd.0001442.s002.pdf [file pntd.0001442.s002.pdf]

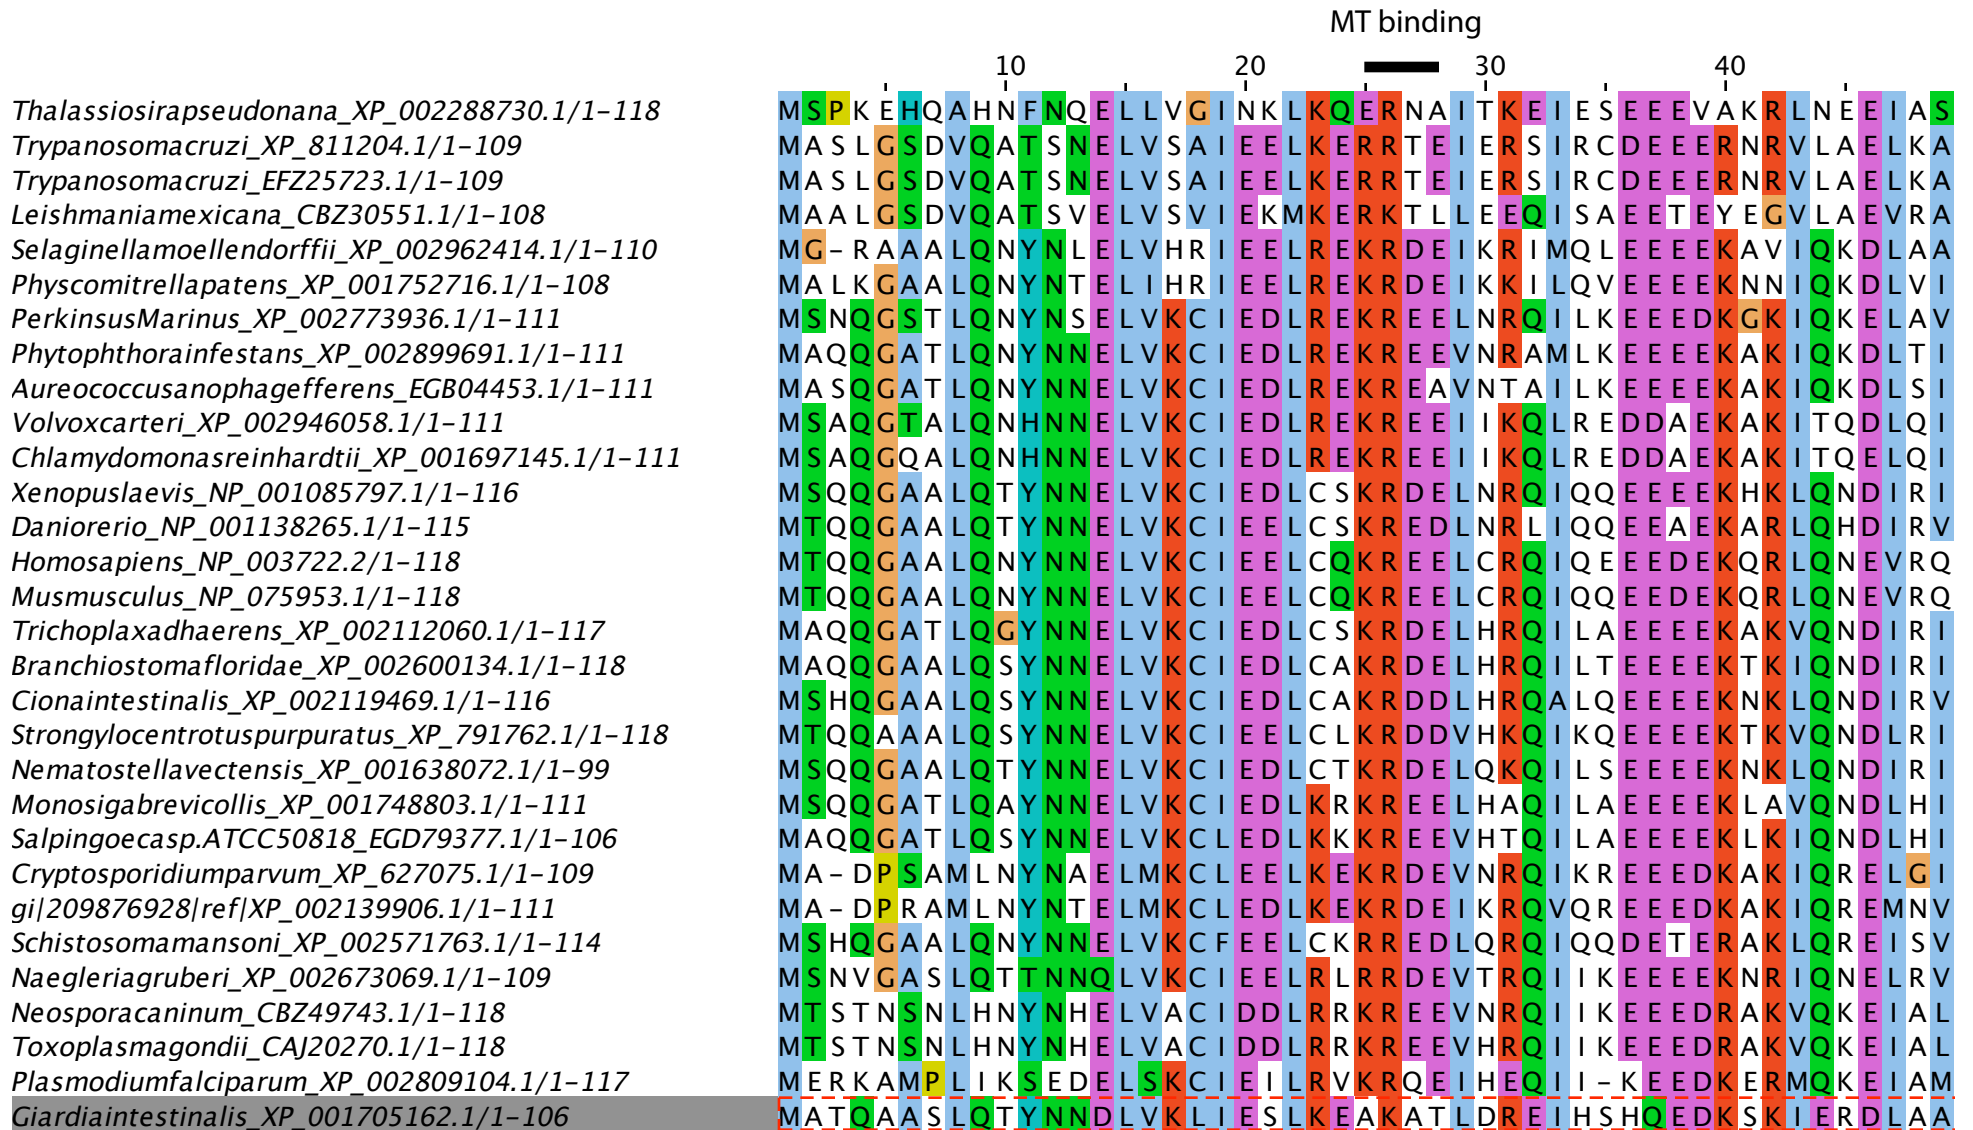

*Thalassiosirapseudonana*\_XP\_002288730.1/1-118  
*Trypanosomacruz*i\_XP\_811204.1/1-109  
*Trypanosomacruz*i\_EFZ25723.1/1-109  
*Leishmaniamexicana*\_CBZ30551.1/1-108  
*Selaginellamoellendorffii*\_XP\_002962414.1/1-110  
*Physcomitrellapatens*\_XP\_001752716.1/1-108  
*PerkinsusMarinus*\_XP\_002773936.1/1-111  
*Phytophthorainfestans*\_XP\_002899691.1/1-111  
*Aureococcusanophagefferens*\_EGB04453.1/1-111  
*Volvoxcarteri*\_XP\_002946058.1/1-111  
*Chlamydomonasreinhardtii*\_XP\_001697145.1/1-111  
*Xenopuslaevis*\_NP\_001085797.1/1-116  
*Daniorerio*\_NP\_001138265.1/1-115  
*Homo sapiens*\_NP\_003722.2/1-118  
*Mus musculus*\_NP\_075953.1/1-118  
*Trichoplaxadhaerens*\_XP\_002112060.1/1-117  
*Branchiostomafloridae*\_XP\_002600134.1/1-118  
*Cionaintestinalis*\_XP\_002119469.1/1-116  
*Strongylocentrotuspurpuratus*\_XP\_791762.1/1-118  
*Nematostellavectensis*\_XP\_001638072.1/1-99  
*Monosigabrevicollis*\_XP\_001748803.1/1-111  
*Salpingoecasp.*ATCC50818\_EGD79377.1/1-106  
*Cryptosporidiumparvum*\_XP\_627075.1/1-109  
gi|209876928|ref|XP\_002139906.1/1-111  
*Schistosomamanson*i\_XP\_002571763.1/1-114  
*Naegleriagruber*i\_XP\_002673069.1/1-109  
*Neosporacanium*\_CBZ49743.1/1-118  
*Toxoplasma gondii*\_CAJ20270.1/1-118  
*Plasmodiumfalciparum*\_XP\_002809104.1/1-117  
*Giardiaintestinalis*\_XP\_001705162.1/1-106

|                                                       | 60 | 70 | 80 | 90 |
|-------------------------------------------------------|----|----|----|----|
| LQERLSNANSNLEALRESKEAYNNTIEQTELAYRKIIEESSQTLLHVIKR    |    |    |    |    |
| LNARLTTIEESLQKIQAKSVLDKVIHETSEGFRGIVEASSKLLSNVRE      |    |    |    |    |
| LNARLTTIEESLRQKIQAKSVLDKVIHETSEGFRGIVEASSRLLSNVRE     |    |    |    |    |
| MQERLAA LKDSLAKKQAVRADLERTISEETYSAFKSILDASSKLLSTAKE   |    |    |    |    |
| LSKRRLAELEDSLSRKYAYSSEYDKTIREVESAYAKILESSKALLHVLKT    |    |    |    |    |
| LTKRRLAEIDDSSLRKYAYTNEYDKTIREVEEAYSKAW-CIEIFVAFNRN    |    |    |    |    |
| LTDR LQRINEESLVRKQTQARNEYDKTIQETEAAYMKILESSQTLLHVLKR  |    |    |    |    |
| LTDR LSKINEEALARKTQARNEYDRTIQETEAAYMKILESSQTLLHVLKR   |    |    |    |    |
| LTDR LSKINEEALARRVMARNEYDKTIQETEAAYMKILESSQTLLHVLKR   |    |    |    |    |
| LTKRRLAQVND S IARKTETKNEYDKVISETEEAAYLKILESSQTLLTVLKR |    |    |    |    |
| LTKRRLAQVNESIARKTETKNEYDKVISETEEAAYLKILESSQTLLTVLKR   |    |    |    |    |
| LTEKLSRVNENLARKMASRNEFDKTI AETEAAYMKILESSQTLLNVLKR    |    |    |    |    |
| LTEKLSRVNESLAHRLSARAEFDRTI AETEAAYMKILESSQTLLSVLKK    |    |    |    |    |
| LTEKLARVNENLARKIASRNEFDRTI AETEAAYLKILESSQTLLSVLKR    |    |    |    |    |
| LTEKLARVNENLARKIASRNEFDRTI AETEAAYLKILESSQTLLSVLKR    |    |    |    |    |
| LTEKLAKINEESLAKKMANRNEFDKTI AETEGAYMKILESSQALLGILKR   |    |    |    |    |
| LTERLAKVNESLSKMATRNEFDRTI AETEAAYMKILESSQTLLNVLKR     |    |    |    |    |
| LTERLAKVNESLARKMAARNEFDKTI AETESAYMKILETSQTLLNSVKG    |    |    |    |    |
| LTEKLAKLNEESLAKKIATRNEYDKTI G ETEEAAYMKILESSHSLLNVLQK |    |    |    |    |
| LTERLAKINEESLARKIASRNEFDKTI AETEAAYMKILESSQTLLHVLKN   |    |    |    |    |
| LTERLNRITESTLRKQATRTEYDRTI AETEGAYFKILESSQSLLQVLKR    |    |    |    |    |
| LTERLARVTESLNKKISIRNEYDRTISETESAYMKILDSSQSLLQVLKR     |    |    |    |    |
| LNERLKRVS EESLQRKTIARA EYDKTIQEI EGAYTKILESSQTLLHVLKR |    |    |    |    |
| LNERLKKVHESLQRKTIARA EYDKTIQEI ENAYTKILESSQTLLHVLKR   |    |    |    |    |
| LNDKLSRVNESLQKLLSTRNEYDRTI A ESEAAYMKILESSQTLLTVLKR   |    |    |    |    |
| LS EKLNR LNDGLSRKLQAKQ EYERTLQETEAAYNKILESSQTLLHVLKR  |    |    |    |    |
| LQDR LQKLNESLTRKIQARNEYDKTISETEEAAYTKILESAQTLLHVLKR   |    |    |    |    |
| LQER LQKLNDSITRKIQARNEYDKTILETEEAAYTKILESAQTLLHVLKR   |    |    |    |    |
| LNDK LQEVCHSIAKKLQTRLE YDRTIKETS AAYTKIRESAKSL LHILKR |    |    |    |    |
| LQNR YKELDAALIQKTQARAEYEKTIRES E LAYNSIIE SAKKLTGILKD |    |    |    |    |

|                                                        | 100                                     | 110 |
|--------------------------------------------------------|-----------------------------------------|-----|
| <i>Thalassiosirapseudonana</i> _XP_002288730.1/1-118   | E S K S I Q K S R R Q K Q Y C D E V D F |     |
| <i>Trypanosomacruzi</i> _XP_811204.1/1-109             | G S S G I P R H D G L - - - - -         |     |
| <i>Trypanosomacruzi</i> _EFZ25723.1/1-109              | E S S G L P R H D G L - - - - -         |     |
| <i>Leishmaniamexicana</i> _CBZ30551.1/1-108            | E S S A L K A Q I N - - - - -           |     |
| <i>Selaginellamoellendorffii</i> _XP_002962414.1/1-110 | E P M N P S M D L L K K P - - - - -     |     |
| <i>Physcomitrellapatens</i> _XP_001752716.1/1-108      | N N N N H H H H N I E - - - - -         |     |
| <i>PerkinsusMarinus</i> _XP_002773936.1/1-111          | E S V N L T K K K Q V S D - - - - -     |     |
| <i>Phytophthorainfestans</i> _XP_002899691.1/1-111     | E T V Q L T K K K Q T S S - - - - -     |     |
| <i>Aureococcusanophagefferens</i> _EGB04453.1/1-111    | E T V N L T K K K Q Y S S - - - - -     |     |
| <i>Volvoxcarteri</i> _XP_002946058.1/1-111             | E A V N I A K K K Q A S S - - - - -     |     |
| <i>Chlamydomonasreinhardtii</i> _XP_001697145.1/1-111  | E A V N I A K K K Q A S S - - - - -     |     |
| <i>Xenopuslaevis</i> _NP_001085797.1/1-116             | E A G N L G K A T D L R G N A T N S - - |     |
| <i>Daniorerio</i> _NP_001138265.1/1-115                | E A G N L T K A T E P R S S K D H - - - |     |
| <i>Homo sapiens</i> _NP_003722.2/1-118                 | E A G N L T K A T A P D Q K S S G G R D |     |
| <i>Mus musculus</i> _NP_075953.1/1-118                 | E A G N L T K A T A S D Q K S S G G K D |     |
| <i>Trichoplaxadhaerens</i> _XP_002112060.1/1-117       | D T Y K L K D G P K S T S E G Q T R A - |     |
| <i>Branchiostomafloridae</i> _XP_002600134.1/1-118     | E A T S L K E P T A A S S S P P P Q K G |     |
| <i>Cionaintestinalis</i> _XP_002119469.1/1-116         | S I H H M D G G K G H K M E Y G A K - - |     |
| <i>Strongylocentrotuspurpuratus</i> _XP_791762.1/1-118 | E A A V L K D K G V P G F T N A S S T T |     |
| <i>Nematostellavectensis</i> _XP_001638072.1/1-99      | E - - - - - - - - - - - - - - - - -     |     |
| <i>Monosigabrevicollis</i> _XP_001748803.1/1-111       | D S V A L Q E S G D N S S - - - - -     |     |
| <i>Salpingoecasp.</i> ATCC50818_EGD79377.1/1-106       | D S V A L E E R - - - - -               |     |
| <i>Cryptosporidiumparvum</i> _XP_627075.1/1-109        | E S V N L S N P K K R A - - - - -       |     |
| <i>gi 209876928 ref XP_002139906.1/1-111</i>           | E S V N L S N P K K H I G I - - - - -   |     |
| <i>Schistosomamansonii</i> _XP_002571763.1/1-114       | E G Q N I V Q K A T A K N V P F - - - - |     |
| <i>Naegleriagruberii</i> _XP_002673069.1/1-109         | E S A S L S K K V G Q - - - - -         |     |
| <i>Neosporacanium</i> _CBZ49743.1/1-118                | E S V H L G R K T S G E R G D V P G V G |     |
| <i>Toxoplasma gondii</i> _CAJ20270.1/1-118             | E S V H L G R K T S G D R A E L P G I G |     |
| <i>Plasmodiumfalciparum</i> _XP_002809104.1/1-117      | E E S H L G N K L Y S G T S D E D L R S |     |
| <i>Giardiaintestinalis</i> _XP_001705162.1/1-106       | R A G N I I S N - - - - -               |     |
