# Supplementary material for: Novel Structural Components of the Ventral Disc and Lateral Crest in Giardia intestinalis
Source: PubMed Central journal article supplement (PMC3243723; doi:10.1371/journal.pntd.0001442), 2011-12-20
Supplement: pntd.0001442.s004.pdf [file pntd.0001442.s004.pdf]

**GATEWAY and other primers for disc-associated proteins (DAPs)**

| <b>GiardiaDB</b> | <b>Forward primer sequence (5' to 3')</b>    | <b>Reverse primer sequence (5' to 3')</b>                  |
|------------------|----------------------------------------------|------------------------------------------------------------|
| GL50803_4410     | CACCAGGAAAGCGTTGGTGTCAAGAACC                 | CAGGACACCCACTCCCCTG                                        |
| GL50803_4812*    | GATCGGGCGCCCATGTCTATGTTACCTCCACCCGTACGGCTCAC | ACCGGTAGAGCGCCGGCTCGGGCTCCGGCCGTGCGCCGTGCTTTGTGACCATCGAGAG |
| GL50803_5374     | CACCGCTTAGCACACACAAAACAGTATATTACAT           | CAGGTCCGAAATGGAGCTGTCTAG                                   |
| GL50803_6417     | CACCACCACAACCTGCATACGTGTGG                   | AGTCTGCACATGTTATTGTACAGTCCGT                               |
| GL50803_7203     | CACCGGGACCGTCACTGTCATTATCATCAG               | CCCCGAGAGGAATCTCCGCA                                       |
| GL50803_8445     | CACCTGGGTTGCAAAACGCCCTG                      | CTTGTGTTAGTCTGTAGCCATGTTCTTAT                              |
| GL50803_9030     | CACCGCAATTTTCGAAGCTGTATGGGTCT                | AACATTCTTAGAGTCGGCCATGGACAAAATCA                           |
| GL50803_9909     | CACCAGATAAGCAACCCCTCGAGTGCC                  | CTGGTTAGTGCAGCCCTGTATAGC                                   |
| GL50803_11311    | CACCAGCCAAATGCAATTCTAATCAATTAAGCT            | ATAGCCTTATATGTTCCGGCGTTCAG                                 |
| GL50803_11390    | CACCTGGGTACATCGACAAGTACACTACCG               | ACAGGGGATGAACCACTGAG                                       |
| GL50803_13766    | CACCGTCCCAGCTGTTTAGCTTTTCGACA                | AAAGCCTAGCCCTCCGTACTG                                      |
| GL50803_13981    | CACCATTTAGAGCGTGGGGAAAGTACATAGC              | TATATAAGAGAATATTATCTGTAATGTC                               |
| GL50803_14270    | CACCAGCAAGTCATAGTAAATGCAGCAGATATGG           | ATCCGTCTGGGGCTTTTGTATGAC                                   |
| GL50803_14872    | CACCTCAGTAGCTTAGGATGGGTTCTCCC                | AATAGGCCCTCCACGGGGC                                        |
| GL50803_15054    | CACCGAGACCGTGGCCAAAGAGC                      | CTGCATGAATCCAGCGCAAG                                       |
| GL60803_15101    | CACCAGCAATCTCTATTACTCAACCAAGTTTAT            | TGCCCTCGGGAGCCCAAG                                         |
| GL50803_15409    | CACCTCCCTACGCACACGTCCCGGAAGAT                | CAGGTTCCAGACTCAGCCTCTGCTGCTC                               |
| GL50803_15427    | CACCAGAACAACTGTTCAAGAGTCTGGTCA               | AAAGCCTATCTTGATCTGCCTAATGAACC                              |
| GL50803_15456    | CACCACGCTCCGTTGGTTGTTAGTGC                   | ATAGGCTTTGGTTAGTATCTCTTAATACG                              |
| GL50803_15576    | CACCGAATTGGATAGTAAGCTAGAGGCGCTAAAC           | TTTTCTGGATGCCCTCTTCTCTTAGTAAG                              |
| GL50803_15993    | CACCCTCTAAAAAGAGCAGGAGACCTATAAAACA           | TAAATATTTCCCATCATCTCCTGCAACAT                              |
| GL50803_15995    | CACCTCCGGAGCCTCTCTGAGC                       | CTTGGTTCGTAAGCGGCCTCC                                      |
| GL50803_16220    | CACCTATTATGCTAGCCCTTCGGACACAGA               | GATGGTTTTCTTGGTTGCTTAGAAGC                                 |
| GL50803_16263    | CACCCCCATAGGCCCCCTTCCC                       | GTTGCTGATAATGTTACCCGCTCTATCC                               |
| GL50803_16343*   | GGCGCGCCATGTCGAGGCTATGTTTTTCAGCAAGATCG       | ACCGGTAGCCCTGCCCTGCCCTGCCCGCGCAACTTACCCTTCGGCCC            |
| GL50803_16424    | CACCCCCAGTAGTAAATACCCCAAGATTTGTCTG           | GTAGCGACGATTACCGGATGAGTG                                   |
| GL50803_16650*   | AATTGGCGCGCCAGTGTTCCTGCTTACTCTGTTTTGTATAAG   | ATCGAACCGGTAGGCTTTTCTGACGTGCTCCAAGCATCGGCAGCCTTG           |
| GL50803_16745    | CACCAGGATGAGACTGAGAAGTGGCT                   | TTTGGGTTGAATAGACGCTAGGTTG                                  |
| GL50803_17053    | CACCATACATCCATCGGTTAAAGAACCTAATT             | TATCAAGTCTGCGCCTGTCTG                                      |
| GL50803_17090    | CACCCATCGTGTGCGCCGCTAGAAATC                  | CGCGAGCTCGACCTCGAC                                         |
| GL50803_17096    | CACCACGGAGAAATTCATAGCGCGGAC                  | AAGAACGCGGGGGTGTCTG                                        |
| GL50803_17097    | CACCTGCACACTGACAACATCGTGTCCG                 | AGGACGGTAGTTGTTGATGCACTCGAGGATGGT                          |
| GL50803_17230*   | ATAAGCGCGCCATGAAGTCATCGTTTTCGACCGTCAGCTCC    | ACCGGTAGAGCGCCGGCTCCGGCTCCGGCCGTGCGCCATCAACCTTCGTCGTATGATC |
| GL50803_17231    | CACCTCGCACACATCTTGTCTGTTTCACATC              | GACATACGCTCGAAGGCATTTGATCA                                 |
| GL50803_17249    | CACCAGCAGGACATCTACAAGAGGCTCA                 | ATCAAAGATTTCTAGAAGAGACGGGGC                                |
| GL50803_17250    | CACCCAATGAAGGCATAGACCCCGAAATTAAT             | CCCGAAGTTTAGCCAGGATCCTCCGACGGTCT                           |
| GL50803_17536    | CACCTATCTCCTCGTCTCTCCCTT                     | GCTCATTATGTTTCGAAGGTCCG                                    |
| GL50803_17585    | CACCGCGTCCCTCCCTGGCC                         | CCTTCTTCTTTCATACCCGGACATGTAATC                             |
| GL50803_17586    | CACCTGGTGCGCCGTTATGAGCG                      | TATCCAGTCATATCCAGAAGAAGACGG                                |
| GL50803_23492    | CACCAACAGCTTCTGCACCATGGCT                    | CATCTTGCGAAGGATTGCCACCA                                    |
| GL50803_24194    | CACCGAGCGGCAGAGATGAAGCTTTTCT                 | CACCTGTTGTCTTGTCTGGATACTC                                  |
| GL50803_24321    | CACCTCTATGTAGCTGATGGACGCGGT                  | AGCTGAAAGCTCGCCCTC                                         |
| GL50803_24842    | CACCGAGGAGAACCCCTGGAGTACTTGC                 | CGGAGAAAGATGCTATCAGCCCTC                                   |
| GL50803_86676*   | ATAAGGCGCGCCATGTTGTCAGGGCCAAATGCGCGCTTCTGC   | ACCGGTAGAGCGCCGGCTCCGGCTCCGGCCGTGCGCCGAAGACAAACTTCTCCTCTG  |
| GL50803_87817    | CACCGTTTGACCCAGTGAAGGAGATG                   | CTGATAAGGTTCTAGGCATAAAGGGA                                 |
| GL50803_91354    | CACCGAGCTTTGCCCGTTGTGAAG                     | ACGCCACCTTCTGTTTGTACGT                                     |
| GL50803_101906   | CACCCAGGTCAGCAGGGCCTGAG                      | GGTGGAGCCGAACCTCCG                                         |
| GL50803_102455   | CACCCATTGGGTCCCTGGATG                        | CTCCATATGCGACGTTTCTTTGTTCT                                 |
| GL50803_103285   | CACCAAAGGGGTACAGTAGCAGCGATG                  | CACCCAGCACTGACCAGG                                         |
| GL50803_103807   | CACCATTTACTGAACTTCTGTTTACTCGTTGAA            | GTGGGTGCCAGCCCTTCTTCT                                      |
| GL50803_103810   | CACCGTACTAGTGGTTTTTGTCTGGCAATC               | GACGGATCTGCTAGACAGAAGAGAGC                                 |
| GL50803_112729*  | ATTAGGCGCCCGTGAATGGAGTCTTGAAGAATGCACGCCAG    | ATCGAACCGGTAGCTTATGGTATATTTCGATCCGTGACTGTCTGT              |
| GL50803_137716   | CACCACGCCGCGCCATCTG                          | CTGGAGGTCAGGGGCC                                           |

\*These primers were used to generate amplicons for cloning into pGFPpac (Dawson, 2007)
